# Supplementary material for: Regulation of plasmid-encoded isoprene metabolism in Rhodococcus, a representative of an important link in the global isoprene cycle
Source: PubMed Central journal article supplement (PMC4676930; doi:10.1111/1462-2920.12793), 2015-04-15
Supplement: emi0017-3314-sd1.pdf [file emi0017-3314-sd1.pdf]

## Supplementary Information

### Supplementary Tables

**Table S1.** Growth of laboratory strains on propene, propane and isoprene

| Strain                      | Propene | Propane | Isoprene |
|-----------------------------|---------|---------|----------|
| <i>Rhodococcus</i> sp. AD45 | -       | -       | +        |
| <i>R. opacus</i> PD630      | -       | +       | +        |
| <i>R. opacus</i> DSM 1069   | n.d.    | +       | -        |
| <i>X. autotrophicus</i> PY2 | +       | n.d.    | -        |
| <i>R. rhodochrous</i> B276  | +       | +       | -        |
| <i>R. rhodochrous</i> PNKb1 | -       | +       | -        |
| <i>R. aetherivorans</i> I24 | n.d.    | +       | -        |
| <i>Rhodococcus</i> sp. RHA1 | -       | +       | -        |

n.d., not determined.

**Table S2. List of *Rhodococcus* sp. AD45 genes referred to in the text****Central metabolism**

| Enzyme                            | Gene        | EC.      | SZ00_ | Best NCBI Blastp hit           | Amino acid % id | Pathway/function             | Comments (reference) |
|-----------------------------------|-------------|----------|-------|--------------------------------|-----------------|------------------------------|----------------------|
| Phosphoglycerate mutase           | <i>gpmA</i> | 5.4.2.11 | 00076 | <i>R. sp.</i> P27              | 243/248 (98%)   | Glycolysis                   |                      |
| Isocitrate lyase                  | <i>aceA</i> | 4.1.3.1  | 00123 | <i>R. erythropolis</i> PR4     | 429/429 (100%)  | Glyoxylate bypass            |                      |
| Dihydrolipoyl dehydrogenase       | <i>lpdA</i> | 1.8.1.4  | 00150 | <i>R. erythropolis</i> PR4     | 454/467 (97%)   | Central metabolism           |                      |
| Acetate kinase                    | <i>ackA</i> | 2.7.2.1  | 00224 | <i>R. qingshengii</i>          | 362/388 (93%)   | Acetate metabolism           |                      |
| Phosphate acetyltransferase       | <i>pta</i>  | 2.3.1.8  | 00225 | <i>R. erythropolis</i> PR4     | 626/692 (90%)   | Acetate metabolism           |                      |
| Fructose bisphosphate aldolase    | <i>fba</i>  | 4.1.2.13 | 00291 | <i>R. qingshengii</i>          | 330/345 (96%)   | Pentose phosphate            |                      |
| Phosphoenolpyruvate carboxykinase | <i>pck</i>  | 4.1.1.32 | 00724 | <i>R. sp.</i> P27              | 599/608 (99%)   | Gluconeogenesis              |                      |
| Succinate dehydrogenase s/u       | <i>sdhC</i> | 1.3.5.1  | 01383 | <i>R. erythropolis</i>         | 215/248 (87%)   | TCA cycle                    |                      |
| Succinate dehydrogenase s/u       | <i>sdhA</i> | 1.3.5.1  | 01384 | <i>R. sp.</i> P27              | 605/649 (93%)   | TCA cycle                    |                      |
| Succinate dehydrogenase s/u       | <i>sdhB</i> | 1.3.5.1  | 01385 | <i>R. erythropolis</i>         | 236/249 (95%)   | TCA cycle                    |                      |
| Methylmalonyl-CoA epimerase       | <i>mce</i>  | 5.1.99.1 | 02324 | <i>R. erythropolis</i>         | 150/160 (94%)   | Methylmalonyl-CoA pathway    |                      |
| Ribose-5-phosphate isomerase B    | <i>rpiB</i> | 5.3.1.6  | 02411 | <i>R. erythropolis</i> PR4     | 154/157 (98%)   | Pentose phosphate            |                      |
| Ribokinase                        | <i>rbsK</i> | 2.7.1.15 | 02448 | <i>R. qingshengii</i>          | 230/287 (80%)   | Pentose phosphate            |                      |
| Pyruvate dehydrogenase comp E1    | <i>aceE</i> | 1.2.4.1  | 02558 | <i>R. erythropolis</i> PR4     | 905/951 (95%)   | Central metabolism           |                      |
| 6-phosphofructokinase             | <i>pfkA</i> | 2.7.1.11 | 02669 | <i>R. erythropolis</i> PR4     | 338/343 (99%)   | Glycolysis/pentose phosphate |                      |
| Pyruvate carboxylase              | <i>pyc</i>  | 6.4.1.1  | 02713 | <i>R. erythropolis</i> PR4     | 1099/1134 (97%) | Central metabolism           |                      |
| Malate:quinone oxidoreductase     | <i>mgo</i>  | 1.1.5.4  | 02819 | <i>R. erythropolis</i> SK121   | 491/512 (96%)   | TCA cycle                    |                      |
| Phosphocarrier protein            | <i>ptsH</i> |          | 02976 | <i>R. erythropolis</i> PR4     | 79/85 (93%)     | Sugar metabolism             |                      |
| PTS transporter subunit           | <i>fruA</i> |          | 02977 | <i>R. qingshengii</i>          | 623/694 (90%)   | Sugar metabolism             |                      |
| Phosphofructokinase               | <i>pfk</i>  | 2.7.1.11 | 02978 | <i>R. erythropolis</i> PR4     | 258/310 (83%)   | Glycolysis/sugar metabolism  |                      |
| Sugar metabolism regulator        | <i>glcR</i> |          | 02979 | <i>R. qingshengii</i>          | 232/255 (91%)   | Sugar metabolism             |                      |
| Phosphotransferase PTS enzyme 1   | <i>pts1</i> | 2.7.3.9  | 02980 | <i>R. erythropolis</i> SK121   | 480/545 (88%)   | Sugar metabolism             |                      |
| Glucokinase                       | <i>ppgK</i> | 2.7.1.63 | 03027 | <i>R. erythropolis</i> CCM2595 | 215/244 (88%)   | Central metabolism           |                      |
| Sugar transporter                 | <i>xylE</i> |          | 03047 | <i>R. qingshengii</i>          | 449/480 (94%)   | Sugar metabolism             |                      |
| Malate dehydrogenase              | <i>mdh</i>  | 1.1.1.37 | 03158 | <i>R. erythropolis</i> PR4     | 289/328 (88%)   | TCA cycle                    |                      |
| Dihydrolipoyl transacetylase      | <i>pdhC</i> | 2.3.1.12 | 03267 | <i>R. JVH1</i>                 | 260/379 (69%)   | Central metabolism           |                      |
| Phosphoenolpyruvate synthase      | <i>ppsA</i> | 2.7.9.2  | 03306 | <i>R. erythropolis</i>         | 612/752 (81%)   | Gluconeogenesis              |                      |
| Ribulose-phosphate 3-epimerase    | <i>rpe</i>  | 5.1.3.1  | 03374 | <i>R. erythropolis</i> PR4     | 214/227 (94%)   | Pentose phosphate            |                      |

|                                           |             |          |       |                                |                 |                               |                                                      |
|-------------------------------------------|-------------|----------|-------|--------------------------------|-----------------|-------------------------------|------------------------------------------------------|
| Glyceraldehyde-3-phosphate dehydrogenase  | <i>gapA</i> | 1.2.1.12 | 03384 | <i>R. erythropolis</i> PR4     | 337/339 (99%)   | Glycolysis                    |                                                      |
| Phosphoglycerate kinase                   | <i>pgk</i>  | 2.7.2.3  | 03385 | <i>R. erythropolis</i> SK121   | 399/403 (99%)   | Glycolysis                    |                                                      |
| Triosephosphate isomerase                 | <i>tpi</i>  | 5.3.1.1  | 03386 | <i>R. erythropolis</i> PR4     | 252/261 (97%)   | Glycolysis /pentose phosphate |                                                      |
| Phosphoenolpyruvate carboxylase           | <i>ppc</i>  | 4.1.1.31 | 03389 | <i>R. qingshengii</i>          | 856/926 (92%)   | Central metabolism            | 53% id to CAA32450.1 from <i>C. glutamicum</i> (1)   |
| 6-phosphoglucolactonase                   | <i>pgl</i>  | 3.1.1.31 | 03412 | <i>R. qingshengii</i>          | 226/246 (92%)   | Pentose phosphate             |                                                      |
| Glucose-6-phosphate dehydrogenase s/u     | <i>opcA</i> |          | 03413 | <i>R. erythropolis</i> SK121   | 290/302 (96%)   | Pentose phosphate             |                                                      |
| Glucose-6-phosphate 1-dehydrogenase       | <i>zwf</i>  | 1.1.1.49 | 03414 | <i>R. erythropolis</i> SK121   | 489/514 (95%)   | Pentose phosphate             |                                                      |
| Transaldolase                             | <i>tal</i>  | 2.2.1.2  | 03415 | <i>R. qingshengii</i>          | 370/377 (98%)   | Pentose phosphate             |                                                      |
| Transketolase                             | <i>tkt</i>  | 2.2.1.1  | 03416 | <i>R. erythropolis</i> SK121   | 686/700 (98%)   | Pentose phosphate             |                                                      |
| Aconitate hydratase                       | <i>acnA</i> | 4.2.1.3  | 03443 | <i>R. erythropolis</i>         | 921/933 (99%)   | TCA cycle                     |                                                      |
| Methylmalonyl-CoA mutase s/u              | <i>mcmA</i> | 5.4.99.2 | 03468 | <i>R. erythropolis</i> CCM2595 | 589/631 (93%)   | Methylmalonyl-CoA pathway     |                                                      |
| Methylmalonyl-CoA mutase s/u              | <i>mcmB</i> | 5.4.99.2 | 03469 | <i>R. erythropolis</i> SK121   | 735/742 (99%)   | Methylmalonyl-CoA pathway     |                                                      |
| 6-phosphogluconate dehydrogenase          | <i>ygjI</i> | 1.1.1.44 | 03482 | <i>R. erythropolis</i>         | 484/485 (99%)   | Pentose phosphate             |                                                      |
| Gluconolactonase                          | <i>pgl</i>  | 3.1.1.17 | 03572 | <i>R. triatomae</i>            | 261/312 (84%)   | Pentose phosphate             |                                                      |
| Malate synthase                           | <i>aceB</i> | 2.3.3.9  | 03691 | <i>R. erythropolis</i> CCM2595 | 710/727 (98%)   | Glyoxylate bypass             |                                                      |
| Dihydrolipoyl transacetylase              | <i>pdhC</i> | 2.3.1.12 | 04014 | <i>R. qingshengii</i>          | 418/437 (96%)   | Central metabolism            |                                                      |
| 2-methylcitrate dehydratase               | <i>prpD</i> | 4.2.1.79 | 04293 | <i>R. erythropolis</i>         | 472/500 (94%)   | Methylcitrate cycle           |                                                      |
| 2-methylisocitrate lyase                  | <i>prpB</i> | 4.1.3.30 | 04294 | <i>R. erythropolis</i> SK121   | 295/305 (97%)   | Methylcitrate cycle           |                                                      |
| 2-methylcitrate synthase                  | <i>prpC</i> | 2.3.3.5  | 04295 | <i>R. erythropolis</i>         | 355/373 (95%)   | Methylcitrate cycle           |                                                      |
| Pyruvate carboxylase                      | <i>pyc</i>  | 6.4.1.1  | 04296 | <i>R. erythropolis</i> CCM2595 | 1024/1136 (90%) | Gluconeogenesis               | 67% id with <i>pyc</i> from <i>C. glutamicum</i> (2) |
| Citrate synthase                          | <i>gltA</i> | 2.3.3.1  | 04401 | <i>R. erythropolis</i> PR4     | 370/375 (99%)   | TCA cycle                     |                                                      |
| Citrate synthase type II                  | <i>gltA</i> | 2.3.3.1  | 04405 | <i>R. erythropolis</i> PR4     | 424/432 (98%)   | TCA cycle                     |                                                      |
| Glycerol kinase                           | <i>glpK</i> | 2.7.1.30 | 04412 | <i>R. erythropolis</i> SK121   | 489/502 (97%)   | Central metabolism            |                                                      |
| Glucose-6-phosphate isomerase             | <i>pgi</i>  | 5.3.1.9  | 04532 | <i>R. erythropolis</i> PR4     | 504/553 (91%)   | Pentose phosphate             |                                                      |
| Succinyl-CoA synthetase $\beta$ -subunit  | <i>sucC</i> | 6.2.1.5  | 04537 | <i>R. erythropolis</i> PR4     | 388/389 (99%)   | TCA cycle                     |                                                      |
| Succinyl-CoA synthetase $\alpha$ -subunit | <i>sucD</i> | 6.2.1.5  | 04538 | <i>R. erythropolis</i> PR4     | 296/300 (99%)   | TCA cycle                     |                                                      |
| Ribose-phosphate pyrophosphokinase        | <i>prs</i>  | 2.7.6.1  | 04645 | <i>R. triatomae</i>            | 307/326 (94%)   | Central metabolism            |                                                      |
| Enolase                                   | <i>eno</i>  | 4.2.1.11 | 04673 | <i>R. erythropolis</i> PR4     | 426/428 (99%)   | Glycolysis                    |                                                      |
| Serine hydroxymethyltransferase           | <i>glyA</i> | 2.1.2.1  | 04728 | <i>R. erythropolis</i> PR4     | 425/435 (98%)   | One-carbon metabolism         |                                                      |
| Fumarate hydratase                        | <i>fum</i>  | 4.2.1.2  | 04735 | <i>R. erythropolis</i> PR4     | 448/467 (96%)   | TCA cycle                     |                                                      |

|                                                             |             |          |       |                                |                 |                              |
|-------------------------------------------------------------|-------------|----------|-------|--------------------------------|-----------------|------------------------------|
| Fructose 1-6-bisphosphatase                                 | <i>glpX</i> | 3.1.3.11 | 04736 | <i>R. erythropolis</i> PR4     | 343/344 (99%)   | Gluconeogenesis              |
| Malate dehydrogenase (oxaloacetate-decarboxylating) (NADP+) | <i>maeB</i> | 1.1.1.40 | 04835 | <i>R. erythropolis</i> PR4     | 381/397 (96%)   | Central metabolism           |
| 2-oxoglutarate dehydrogenase                                | <i>sucA</i> | 1.2.4.2  | 04845 | <i>R. sp.</i> P27              | 1201/1257 (96%) | TCA cycle                    |
| Pyruvate kinase                                             | <i>pyk</i>  | 2.7.1.40 | 04986 | <i>R. erythropolis</i> CCM2595 | 428/444 (96%)   | Glycolysis                   |
| Pyruvate dehydrogenase (quinone)                            | <i>poxB</i> | 1.2.5.1  | 05156 | <i>R. erythropolis</i> CCM2595 | 543/591 (92%)   | Central metabolism           |
| Glucokinase                                                 | <i>glk</i>  | 2.7.1.2  | 05209 | <i>R. erythropolis</i>         | 281/319 (88%)   | Glycolysis                   |
| Dihydrolipoamide succinyltransferase                        | <i>sucB</i> | 2.3.1.61 | 05245 | <i>R. qingshengii</i>          | 500/584 (86%)   | TCA cycle                    |
| Phosphoglucomutase                                          | <i>pgmA</i> | 5.4.2.2  | 05338 | <i>R. erythropolis</i>         | 513/545 (94%)   | Glycolysis/pentose phosphate |
| Isocitrate dehydrogenase (NADP+)                            | <i>icd</i>  | 1.1.1.42 | 05558 | <i>R. erythropolis</i> PR4     | 403/407 (99%)   | TCA cycle (NADP-dependent)   |
| Propionyl-CoA carboxylase $\alpha$ -subunit                 | <i>pccA</i> | 6.4.1.3  | 05779 | <i>R. erythropolis</i>         | 652/661 (99%)   | Methylmalonyl-CoA pathway    |
| Propionyl-CoA carboxylase $\beta$ -subunit                  | <i>pccB</i> | 6.4.1.3  | 05780 | <i>R. erythropolis</i> PR4     | 532/532 (100%)  | Methylmalonyl-CoA pathway    |
| PTS glucose transporter subunit IIA                         | <i>ptsG</i> |          | 05917 | <i>R. erythropolis</i> CCM2595 | 134/149 (90%)   | Sugar metabolism             |

### Storage compounds

| Enzyme                                               | gene        | SZ00_ | Best NCBI Blastp hit           | Amino acid % id | Pathway/function | Comments (reference) |
|------------------------------------------------------|-------------|-------|--------------------------------|-----------------|------------------|----------------------|
| 1-acylglycerol-3-phosphate O-acyltransferase (AGPAT) | <i>plsC</i> | 00020 | <i>R. qingshengii</i>          | 209/245 (85%)   | TAG biosynthesis |                      |
| 1-acylglycerol-3-phosphate O-acyltransferase (AGPAT) | <i>plsC</i> | 00059 | <i>R. erythropolis</i>         | 297/345 (86%)   | TAG biosynthesis |                      |
| Diacylglycerol acyltransferase (DGAT)                | <i>atf</i>  | 00067 | <i>R. qingshengii</i>          | 436/488 (89%)   | TAG biosynthesis |                      |
| Glycerol-3-phosphate O-acyltransferase (GPAT)        | <i>plsB</i> | 00068 | <i>R. erythropolis</i> PR4     | 640/770 (83%)   | TAG biosynthesis |                      |
| 1-acylglycerol-3-phosphate O-acyltransferase (AGPAT) | <i>plsC</i> | 00069 | <i>R. erythropolis</i> SK121   | 408/477 (86%)   | TAG biosynthesis |                      |
| Diacylglycerol acyltransferase (DGAT)                | <i>atf</i>  | 00162 | <i>R. erythropolis</i> CCM2595 | 359/472 (76%)   | TAG biosynthesis |                      |
| Diacylglycerol acyltransferase (DGAT)                | <i>atf</i>  | 00170 | <i>R. erythropolis</i>         | 343/486 (71%)   | TAG biosynthesis |                      |
| 1-acylglycerol-3-phosphate O-acyltransferase (AGPAT) | <i>plsC</i> | 00299 | <i>R. erythropolis</i> SK121   | 194/225 (86%)   | TAG biosynthesis |                      |
| 1-acylglycerol-3-phosphate O-acyltransferase (AGPAT) | <i>plsC</i> | 02004 | <i>R. erythropolis</i> SK121   | 237/251 (94%)   | TAG biosynthesis |                      |
| 1-acylglycerol-3-phosphate O-acyltransferase (AGPAT) | <i>plsC</i> | 02005 | <i>R. qingshengii</i>          | 179/213 (84%)   | TAG biosynthesis |                      |
| Fatty acid synthase I                                | <i>fas1</i> | 02346 | <i>R. erythropolis</i>         | 2935/3103 (95%) | TAG biosynthesis |                      |
| Diacylglycerol acyltransferase (DGAT)                | <i>atf</i>  | 03057 | <i>R. erythropolis</i>         | 415/458 (91%)   | TAG biosynthesis |                      |
| Diacylglycerol acyltransferase (DGAT)                | <i>atf</i>  | 03296 | <i>R. erythropolis</i>         | 307/464 (66%)   | TAG biosynthesis |                      |
| Diacylglycerol acyltransferase (DGAT)                | <i>atf</i>  | 03308 | <i>R. erythropolis</i>         | 329/459 (72%)   | TAG biosynthesis |                      |
| Diacylglycerol acyltransferase (DGAT)                | <i>atf</i>  | 04005 | <i>R. imtechensis</i>          | 355/467 (76%)   | TAG biosynthesis |                      |

|                                                      |             |       |                                |               |                          |                                                     |
|------------------------------------------------------|-------------|-------|--------------------------------|---------------|--------------------------|-----------------------------------------------------|
| Phosphatidic acid phosphatase (PAP)                  | <i>pgpB</i> | 04157 | <i>R. erythropolis</i>         | 176/251 (70%) | TAG biosynthesis         |                                                     |
| Phosphatidic acid phosphatase (PAP)                  | <i>pgpB</i> | 04384 | <i>R. erythropolis</i>         | 146/178 (82%) | TAG biosynthesis         |                                                     |
| Diacylglycerol acyltransferase (DGAT)                | <i>atf</i>  | 04530 | <i>R. opacus</i>               | 220/424 (52%) | TAG biosynthesis         |                                                     |
| 1-acylglycerol-3-phosphate O-acyltransferase (AGPAT) | <i>plsC</i> | 05208 | <i>R. erythropolis</i>         | 228/271 (84%) | TAG biosynthesis         |                                                     |
| 1-acylglycerol-3-phosphate O-acyltransferase (AGPAT) | <i>plsC</i> | 05288 | <i>R. qingshengii</i>          | 228/282 (81%) | TAG biosynthesis         |                                                     |
| Diacylglycerol acyltransferase (DGAT)                | <i>atf</i>  | 05428 | <i>R. qingshengii</i>          | 406/469 (87%) | TAG biosynthesis         |                                                     |
| Glycogen branching enzyme                            | <i>glgB</i> | 02329 | <i>R. sp. P27</i>              | 671/727 (92%) | Glycogen metabolism      | 70% id to GlgB from <i>M. tuberculosis</i> H37Rv    |
| Alpha amylase                                        | <i>glgE</i> | 02330 | <i>R. erythropolis</i>         | 609/663 (92%) | Glycogen metabolism      | 64% id to GlgE from <i>M. tuberculosis</i> H37Rv    |
| Glycogen phosphorylase                               | <i>glgP</i> | 02331 | <i>R. erythropolis</i>         | 828/866 (96%) | Glycogen metabolism      | 65% id to GlgP from <i>M. tuberculosis</i> H37Rv    |
| Glycogen synthase                                    | <i>glgA</i> | 04814 | <i>R. erythropolis</i> PR4     | 336/386 (87%) | Glycogen metabolism      | 66% id to Rv1212C from <i>M. tuberculosis</i> H37Rv |
| Glucose-1-phosphate adenylyltransferase              | <i>glgC</i> | 04815 | <i>R. erythropolis</i> PR4     | 393/398 (99%) | Glycogen metabolism      |                                                     |
| Glycogen debranching enzyme                          | <i>treX</i> | 05140 | <i>R. erythropolis</i>         | 698/787 (89%) | Glycogen metabolism      | 78% id to TreX from <i>M. tuberculosis</i> H37Rv    |
| Malto-oligosyl trehalose synthase                    | <i>treY</i> | 05141 | <i>R. erythropolis</i>         | 593/783 (76%) | Glycogen metabolism      | 50% id to TreY from <i>M. tuberculosis</i> H37Rv    |
| Malto-oligosyl trehalose trehalohydrolase            | <i>treZ</i> | 05150 | <i>R. erythropolis</i>         | 504/573 (88%) | Glycogen metabolism      | 64% id to TreZ from <i>M. tuberculosis</i> H37Rv    |
| SAM-dependent methyltransferase                      |             | 05292 | <i>R. sp. P27</i>              | 259/281 (92%) | Glycogen metabolism      | 65% id to Rv3030 from <i>M. tuberculosis</i> H37Rv  |
| 1,4-alpha-glucan branching protein                   |             | 05293 | <i>R. erythropolis</i> PR4     | 474/519 (91%) | Glycogen metabolism      | 68% id to Rv3031 from <i>M. tuberculosis</i> H37Rv  |
| Glycosyltransferase                                  | <i>glgA</i> | 05294 | <i>R. erythropolis</i>         | 394/414 (95%) | Glycogen metabolism      | 70% id to Rv3032 from <i>M. tuberculosis</i> H37Rv  |
| Debranching enzyme                                   | <i>glgX</i> | 05303 | <i>R. erythropolis</i>         | 584/723 (81%) | Glycogen metabolism      | 47% id to GlgX from <i>E. coli</i>                  |
| Exopolyphosphatase                                   | <i>ppx</i>  | 00072 | <i>R. erythropolis</i> CCM2595 | 276/288 (96%) | Polyphosphate metabolism |                                                     |
| Polyphosphate kinase                                 | <i>ppk</i>  | 02700 | <i>R. erythropolis</i> PR4     | 679/758 (90%) | Polyphosphate metabolism |                                                     |
| Exopolyphosphatase                                   | <i>ppx</i>  | 02851 | <i>R. qingshengii</i>          | 272/334 (81%) | Polyphosphate metabolism |                                                     |
| Exopolyphosphatase                                   | <i>ppx</i>  | 04676 | <i>R. erythropolis</i>         | 272/311 (87%) | Polyphosphate metabolism |                                                     |

#### Alkane metabolism / cytochrome p450

| Enzyme                     | Gene | SZ00_ | Best NCBI Blastp hit      | Amino acid % id | Comments (reference) |
|----------------------------|------|-------|---------------------------|-----------------|----------------------|
| Cytochrome p450 steroid MO |      | 00187 | <i>R. erythropolis</i>    | 414/422 (98%)   |                      |
| Cytochrome p450 144        |      | 00507 | <i>R. rhodochrous</i>     | 337/423 (80%)   |                      |
| Cytochrome p450 130        |      | 00669 | <i>R. qingshengii</i>     | 358/385 (93%)   |                      |
| Cytochrome p450 144        |      | 00785 | <i>Nocardia</i> BMG111209 | 276/421 (66%)   |                      |
| Cytochrome p450 144        |      | 00835 | <i>Frankia</i> EAN1pec    | 320/427 (75%)   |                      |

|                            |             |       |                                           |               |                                                     |
|----------------------------|-------------|-------|-------------------------------------------|---------------|-----------------------------------------------------|
| Ferredoxin                 |             | 00836 | <i>Frankia</i> EAN1pec                    | 42/62 (68%)   |                                                     |
| Cytochrome p450 144        |             | 00917 | <i>R. erythropolis</i> CCM2595            | 271/400 (68%) |                                                     |
| Cytochrome p450 SU2        |             | 00923 | <i>R. erythropolis</i> PR4                | 312/410 (76%) |                                                     |
| Ferredoxin                 |             | 01219 | <i>R. rhodochrous</i>                     | 81/105 (77%)  |                                                     |
| Cytochrome p450 256        |             | 01220 | <i>R. sp.</i> RHA1                        | 335/410 (82%) |                                                     |
| Cytochrome p450            |             | 01678 | <i>R. rhodochrous</i> ATCC 21198          | 340/412 (83%) |                                                     |
| Rhodocoxin reductase       |             | 02121 | <i>Sporichthya polymorpha</i>             | 224/404 (55%) |                                                     |
| Ferredoxin                 |             | 02122 | <i>Actinomycetospora chiangmaiensis</i>   | 35/61 (57%)   |                                                     |
| Cytochrome p450 124        |             | 02123 | <i>Streptomyces scabrisporus</i>          | 255/427 (60%) |                                                     |
| Cytochrome p450 116        |             | 02223 | <i>R. equi</i>                            | 661/768 (86%) |                                                     |
| Alkane hydroxylase         | <i>alkB</i> | 02689 | <i>R. erythropolis</i>                    | 335/386 (87%) | 43% id to <i>A. borkumensis</i> AP1 (CAC38027) (3)  |
| Cytochrome p450 BM3        |             | 03114 | <i>R. triatomae</i>                       | 288/447 (64%) |                                                     |
| Alkane hydroxylase         | <i>alkB</i> | 03717 | <i>R. erythropolis</i>                    | 301/377 (80%) | 43% id to <i>P. oleovorans</i> (P12691.1) (4)       |
| Cytochrome p450 Cam        |             | 03936 | <i>R. rhodochrous</i>                     | 379/448 (85%) |                                                     |
| Ferredoxin                 |             | 03937 |                                           |               |                                                     |
| Cytochrome p450 142        |             | 03954 | <i>R. erythropolis</i> CCM2595            | 350/401 (87%) |                                                     |
| Cytochrome p450 BM3        |             | 03993 | <i>R. erythropolis</i> PR4                | 197/216 (91%) |                                                     |
| Cytochrome p450 BM3        |             | 03994 | <i>R. erythropolis</i> PR4                | 203/229 (89%) |                                                     |
| Cytochrome p450 120        |             | 04035 | <i>R. erythropolis</i> PR4                | 415/454 (91%) |                                                     |
| Cytochrome p450 steroid MO |             | 04082 | <i>R. erythropolis</i> PR4                | 399/416 (96%) |                                                     |
| Cytochrome p450 steroid MO |             | 05010 | <i>R. erythropolis</i> CCM2595            | 371/417 (89%) |                                                     |
| Ferredoxin                 |             | 05014 | <i>R. triatomae</i>                       | 48/64 (75%)   |                                                     |
| Cytochrome p450            |             | 05015 | <i>R. qingshengii</i>                     | 421/452 (93%) |                                                     |
| Cytochrome p450 107B1      |             | 05017 | <i>R. erythropolis</i> PR4                | 343/401 (86%) |                                                     |
| Rubredoxin                 |             | 05444 | <i>R. erythropolis</i> PR4                | 55/59 (93%)   |                                                     |
| Rubredoxin                 |             | 05445 | <i>R. erythropolis</i> PR4                | 47/58 (81%)   |                                                     |
| Alkane hydroxylase         | <i>alkB</i> | 05446 | <i>R. erythropolis</i> PR4                | 362/408 (89%) | 69% id to <i>M. tuberculosis</i> H37Rv (O05895) (3) |
| Cytochrome p450            |             | 05802 | <i>Acidobacteriaceae bacterium</i> KBS 96 | 237/394 (60%) |                                                     |
| Ferredoxin reductase       |             | 06165 | <i>Amycolatopsis</i> sp. ATCC 39116       | 219/406 (54%) | Plasmid encoded                                     |
| Ferredoxin                 |             | 06166 | <i>Gordonia otitidis</i>                  | 68/106 (64%)  | Plasmid encoded                                     |

**Aromatic metabolism**

| Description                                                             | Gene         | SZ00_ | Best NCBI Blastp hit            | Amino acid % id | query strain (reference)             | query strain %id |
|-------------------------------------------------------------------------|--------------|-------|---------------------------------|-----------------|--------------------------------------|------------------|
| Acetyl-CoA acyltransferase                                              | <i>pcaF</i>  | 04335 | <i>R. erythropolis</i> CCM2595  | 382/403 (95%)   | <i>R. sp.</i> RHA1 (5)               | 81               |
| Transcriptional regulator                                               | <i>pcaR</i>  | 04336 | <i>R. erythropolis</i> CCM2595  | 251/274 (92%)   | <i>R. sp.</i> RHA1 (5)               | 70               |
| 3-oxoadipate eno-lactone hydrolase/4-carboxymuconolactone decarboxylase | <i>pcaL</i>  | 04337 | <i>R. erythropolis</i> CCM2595  | 360/392 (92%)   | <i>R. sp.</i> RHA1 (5)               | 63               |
| 3-carboxy-cis, cis-muconate cycloisomerase                              | <i>pcaB</i>  | 04338 | <i>R. erythropolis</i>          | 396/442 (90%)   | <i>R. sp.</i> RHA1 (5)               | 61               |
| Protocatechuate dioxygenase, $\alpha$ -subunit                          | <i>pcaG</i>  | 04339 | <i>R. erythropolis</i>          | 201/223 (90%)   | <i>R. sp.</i> RHA1 (5)               | 64               |
| Protocatechuate dioxygenase, $\beta$ -subunit                           | <i>pcaH</i>  | 04340 | <i>R. erythropolis</i> CCM2595  | 233/239 (97%)   | <i>R. sp.</i> RHA1 (5)               | 72               |
| 3-oxoadipate CoA-transferase, $\alpha$ -subunit                         | <i>pcaI</i>  | 04341 | <i>R. erythropolis</i>          | 247/249 (99%)   | <i>R. sp.</i> RHA1 (5)               | 80               |
| 3-oxoadipate CoA-transferase, $\beta$ -subunit                          | <i>pcaJ</i>  | 04342 | <i>R. erythropolis</i> PR4      | 206/210 (98%)   | <i>R. sp.</i> RHA1 (5)               | 79               |
| Muconolactone delta-isomerase                                           | <i>catC</i>  | 01309 | <i>R. erythropolis</i>          | 90/93 (97%)     | <i>R. erythropolis</i> CCM2595 (6)   | 95               |
| Muconate cycloisomerase                                                 | <i>catB</i>  | 01310 | <i>R. erythropolis</i> PR4      | 366/373 (98%)   | <i>R. erythropolis</i> CCM2595 (6)   | 98               |
| Catechol 1,2-dioxygenase                                                | <i>catA</i>  | 01311 | <i>R. erythropolis</i>          | 273/279 (98%)   | <i>R. erythropolis</i> CCM2595 (6)   | 97               |
| Transcriptional regulator                                               | <i>catR</i>  | 01312 | <i>R. erythropolis</i>          | 251/256 (98%)   | <i>R. erythropolis</i> CCM2595 (7)   | 96               |
| Transcriptional regulator                                               | <i>araC</i>  | 01313 | <i>R. qingshengii</i>           | 304/311 (98%)   | <i>R. sp.</i> RHA1                   | 62               |
| Phenol hydroxylase reductase                                            | <i>pheA2</i> | 01314 | <i>R. qingshengii</i>           | 187/189 (99%)   | <i>R. erythropolis</i> UPV-1 (8)     | 98               |
| Phenol hydroxylase                                                      | <i>pheA1</i> | 01315 | <i>R. erythropolis</i>          | 541/542 (99%)   | <i>R. erythropolis</i> UPV-1 (8)     | 99               |
| Benzoate 1,2-dioxygenase, $\alpha$ -subunit                             | <i>benA</i>  | 01316 | <i>R. erythropolis</i> SK121    | 447/464 (96%)   | <i>R. sp.</i> RHA1 (9)               | 77               |
| Benzoate 1,2-dioxygenase, $\beta$ -subunit                              | <i>benB</i>  | 01317 | <i>R. erythropolis</i> SK121    | 157/169 (93%)   | <i>R. sp.</i> RHA1 (9)               | 85               |
| Benzoate 1,2-dioxygenase, reductase                                     | <i>benC</i>  | 01318 | <i>R. erythropolis</i>          | 466/510 (91%)   | <i>R. sp.</i> RHA1 (9)               | 76               |
| Benzoate diol dehydrogenase                                             | <i>benD</i>  | 01319 | <i>R. erythropolis</i>          | 237/260 (91%)   | <i>R. sp.</i> RHA1 (9)               | 76               |
| Transporter                                                             | <i>benK</i>  | 01320 | <i>R. qingshengii</i>           | 423/460 (92%)   | <i>R. sp.</i> RHA1 (9)               | 78               |
| 4-hydroxybenzoate hydroxylase                                           | <i>pobA2</i> | 00624 | <i>R. triatomae</i>             | 308/393 (78%)   | <i>P. aeruginosa</i> PAO1 (10)       | 45               |
| 4-hydroxybenzoate hydroxylase                                           | <i>pobA1</i> | 01101 | <i>Gordonia sp.</i> NB4-1Y      | 346/400 (87%)   | <i>P. aeruginosa</i> PAO1 (10)       | 48               |
| 3-hydroxybenzoate hydroxylase                                           | <i>narX</i>  | 01673 | <i>Nocardia sp.</i> 348MFTsu5.1 | 357/412 (87%)   | <i>R. NCIMB</i> 12038 (11)           | 51               |
| Mycothioli dependent malelypyruvate isomerase                           | <i>narL</i>  | 01674 | <i>Nocardia sp.</i> 348MFTsu5.2 | 162/229 (71%)   | <i>C. glutamicum</i> ATCC 13032 (12) | 43               |
| Fumarylpyruvate hydrolase                                               | <i>narK</i>  | 01675 | <i>Nocardia sp.</i> 348MFTsu5.3 | 232/278 (83%)   | <i>R. NCIMB</i> 12038 (11)           | 48               |
| Gentisate dioxygenase                                                   | <i>narI</i>  | 01676 | <i>Nocardia sp.</i> 348MFTsu5.4 | 336/378 (89%)   | <i>R. NCIMB</i> 12038 (11)           | 61               |

|                                                |              |       |                                 |               |                            |    |
|------------------------------------------------|--------------|-------|---------------------------------|---------------|----------------------------|----|
| Transcriptional regulator lclR family          | <i>narR</i>  | 01677 | <i>Nocardia</i> sp. 348MFTsu5.5 | 205/255 (80%) | <i>R.</i> NCIMB 12038 (11) | 39 |
| Transcriptional regulator lclR family          | <i>padR</i>  | 03580 | <i>Nocardioides insulae</i>     | 185/251 (74%) | <i>R.</i> sp. RHA1 (5)     | 56 |
| 3,4-dihydroxyphthalate decarboxylase           | <i>padC</i>  | 03592 | <i>Gordonia namibiensis</i>     | 168/233 (72%) | <i>R.</i> sp. RHA1 (5)     | 55 |
| Phthalate 3,4-dioxygenase ferredoxin reductase | <i>padAd</i> | 03593 | <i>Gordonia namibiensis</i>     | 214/378 (57%) | <i>R.</i> sp. RHA1 (5)     | 52 |
| Ferredoxin                                     | <i>padAc</i> | 03594 | <i>Saccharomonospora azurea</i> | 42/65 (65%)   | <i>R.</i> sp. RHA1 (5)     | 65 |
| Phthalate 3,4-dihydrodiol hydrogenase          | <i>padB</i>  | 03595 | <i>Gordonia namibiensis</i>     | 193/260 (74%) | <i>R.</i> sp. RHA1 (5)     | 70 |
| Hypothetical                                   |              | 03596 | <i>Nocardioides insulae</i>     | 72/97 (74%)   | <i>R.</i> sp. RHA1 (5)     | 51 |
| Phthalate 3,4-dioxygenase $\beta$ - subunit    | <i>padAb</i> | 03597 | <i>Gordonia namibiensis</i>     | 150/195 (77%) | <i>R.</i> sp. RHA1 (5)     | 64 |
| Phthalate 3,4-dioxygenase $\alpha$ -subunit    | <i>padAa</i> | 03598 | <i>Gordonia namibiensis</i>     | 406/464 (88%) | <i>R.</i> sp. RHA1 (5)     | 77 |

#### Replication-associated genes

| Description                    | Replicon   | Gene        | SZ00_ | Best NCBI Blastp hit       | amino acid % id |
|--------------------------------|------------|-------------|-------|----------------------------|-----------------|
| DNA gyrase                     | Chromosome | <i>gyrA</i> | 01813 | <i>R. erythropolis</i> PR4 | 814/843(97%)    |
| DNA gyrase                     | Chromosome | <i>gyrB</i> | 01812 | <i>R. imtechensis</i>      | 616/680(91%)    |
| Recombination protein          | Chromosome | <i>recF</i> | 01806 | <i>R. erythropolis</i>     | 366/396(92%)    |
| DNA polymerase subunit         | Chromosome | <i>dnaN</i> | 01805 | <i>R. erythropolis</i> PR4 | 373/394(95%)    |
| Replication initiation protein | Chromosome | <i>dnaA</i> | 01804 | <i>R. erythropolis</i> PR4 | 500/520(96%)    |
| RNase P component              | Chromosome | <i>rnpA</i> | 01803 | <i>R. erythropolis</i>     | 115/126(91%)    |
| Partitioning protein           | Chromosome | <i>parA</i> | 01795 | <i>R. qingshengii</i>      | 307/328(94%)    |
| Partitioning protein           | Chromosome | <i>parB</i> | 01794 | <i>R. qingshengii</i>      | 242/260(93%)    |
| Replication protein            | Plasmid    | <i>rep</i>  | 06269 | <i>R. opacus</i>           | 211/440(48%)    |
| Partitioning protein           | Plasmid    | <i>parA</i> | 06266 | <i>R. qingshengii</i>      | 310/361(86%)    |
| Toxin/antitoxin component      | Plasmid    | <i>relB</i> | 06060 | <i>R.</i> sp. EsD8         | 78/94(83%)      |
| Toxin/antitoxin component      | Plasmid    | <i>relE</i> | 06059 | <i>R.</i> sp. EsD8         | 73/93(78%)      |

References: (1), Eikmanns et al., (1989); (2), Koffas et al., (1998); (3), Smits et al., (2002); (4), Kok et al., (1989); (5), Patrauchan et al., (2005); (6), Knoppová et al., (2007); (7), Vesely et al., (2007); (8), Saa et al., (2010); (9), Kitagawa et al., (2001); (10), Entsch et al., (1988); (11), Liu et al., (2011); (12), Feng et al., (2006).



**Table S3.** Frequency distribution of gene transcription. Transcript abundance is shown as % of total RPKM for each sample and timepoint. Data show the mean of three replicates or 15 replicates (T0) except that six samples in total were excluded as described in *Experimental procedures*.

| RPKM      | T0<br>% | T1<br>EPI | T1<br>Glu | T1<br>Iso | T1<br>N-S | T1<br>Succ | T2<br>EPI | T2<br>Glu | T2<br>Iso | T2<br>N-S | T2<br>Succ |
|-----------|---------|-----------|-----------|-----------|-----------|------------|-----------|-----------|-----------|-----------|------------|
| <2.5      | 8.06    | 7.55      | 6.36      | 9.07      | 6.69      | 14.39      | 16.03     | 7.74      | 10.49     | 8.91      | 15.76      |
| 2.5-12.5  | 14.59   | 15.14     | 16.22     | 19.09     | 12.79     | 22.25      | 23.17     | 17.11     | 18.68     | 19.37     | 21.49      |
| 12.5-62.5 | 35.63   | 39.78     | 33.99     | 32.26     | 39.18     | 26.78      | 33.64     | 31.68     | 32.38     | 32.68     | 26.76      |
| 62.5-315  | 31.17   | 28.20     | 32.27     | 29.19     | 31.11     | 25.19      | 20.91     | 31.92     | 27.93     | 28.58     | 25.02      |
| 315-1575  | 9.41    | 7.97      | 10.05     | 9.18      | 9.07      | 9.76       | 5.30      | 10.46     | 9.18      | 9.21      | 9.28       |
| 1575-7875 | 1.07    | 1.24      | 1.04      | 1.13      | 1.09      | 1.56       | 0.64      | 1.02      | 1.26      | 1.17      | 1.63       |
| >7875     | 0.07    | 0.12      | 0.08      | 0.08      | 0.07      | 0.06       | 0.30      | 0.07      | 0.08      | 0.08      | 0.06       |

| RPKM      | T3<br>EPI | T3<br>Glu | T3<br>Iso | T3<br>NS | T3<br>Succ | T4<br>EPI | T4<br>Glu | T4<br>Iso | T4<br>NS | T4<br>Succ | T5<br>EPI | T5<br>Glu | T5<br>Iso | T5<br>NS | T5<br>Succ |
|-----------|-----------|-----------|-----------|----------|------------|-----------|-----------|-----------|----------|------------|-----------|-----------|-----------|----------|------------|
| <2.5      | 13.63     | 4.45      | 11.22     | 9.04     | 10.46      | 9.79      | 5.98      | 0.29      | 6.09     | 1.80       | 10.48     | 8.77      | 12.03     | 0.03     | 7.83       |
| 2.5-12.5  | 26.54     | 18.89     | 18.56     | 20.10    | 25.22      | 18.85     | 17.37     | 9.93      | 23.14    | 16.17      | 22.93     | 11.43     | 21.00     | 0.11     | 11.11      |
| 12.5-62.5 | 34.01     | 33.19     | 31.93     | 32.78    | 28.51      | 45.15     | 33.75     | 51.20     | 35.82    | 39.18      | 35.50     | 43.22     | 36.03     | 24.62    | 25.02      |
| 62.5-315  | 19.93     | 32.09     | 27.87     | 27.69    | 24.88      | 20.55     | 31.68     | 29.26     | 25.19    | 33.51      | 22.55     | 28.79     | 23.51     | 69.05    | 48.81      |
| 315-1575  | 4.89      | 10.32     | 9.11      | 9.12     | 9.14       | 4.70      | 9.95      | 8.14      | 8.46     | 8.27       | 7.13      | 6.64      | 6.37      | 5.48     | 6.28       |
| 1575-7875 | 0.68      | 0.98      | 1.24      | 1.20     | 1.74       | 0.66      | 1.19      | 1.10      | 1.21     | 0.99       | 1.31      | 1.09      | 0.80      | 0.67     | 0.88       |
| >7875     | 0.31      | 0.09      | 0.07      | 0.08     | 0.04       | 0.30      | 0.07      | 0.08      | 0.08     | 0.08       | 0.09      | 0.06      | 0.26      | 0.04     | 0.06       |

## Supplementary Figures

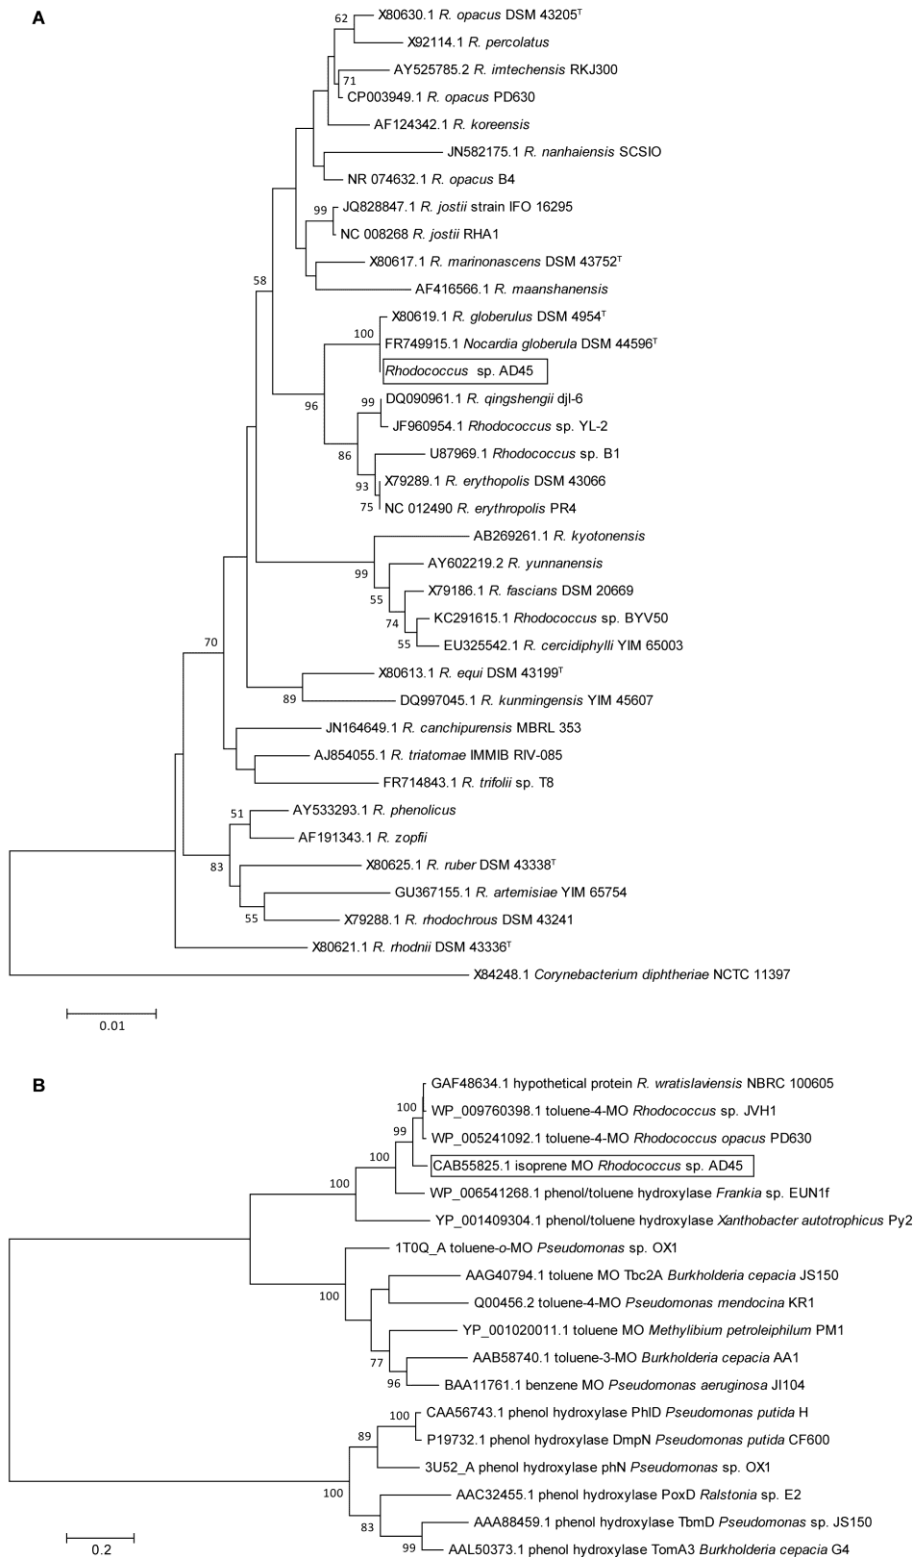

**Fig. S1.** (A) 16S rRNA gene-based phylogenetic relationship between *Rhodococcus* sp. AD45 (shown boxed) and other representative strains. The tree, drawn using the neighbour joining method, was constructed using MEGA6 (Tamura et al., 2013). All positions containing gaps and missing data were eliminated. There were a total of 1,321 nucleotide positions in the final dataset. Bootstrap values (1000 replications) greater than 50% are shown at the nodes. The scale bar shows nucleotide substitutions per site. (B) Un-rooted phylogenetic tree, based on amino acid sequences, relating the *Rhodococcus* sp. AD45 isoprene monooxygenase hydroxylase  $\alpha$ -subunit with other representative enzymes. The tree was constructed using the maximum likelihood method in Mega 6 (Tamura et al., 2013). All positions containing gaps and missing data were eliminated. There were a total of 481 positions in the final dataset. Bootstrap values (500 replications) greater than 75% are shown at the nodes. The scale bar shows amino acid substitutions per site.

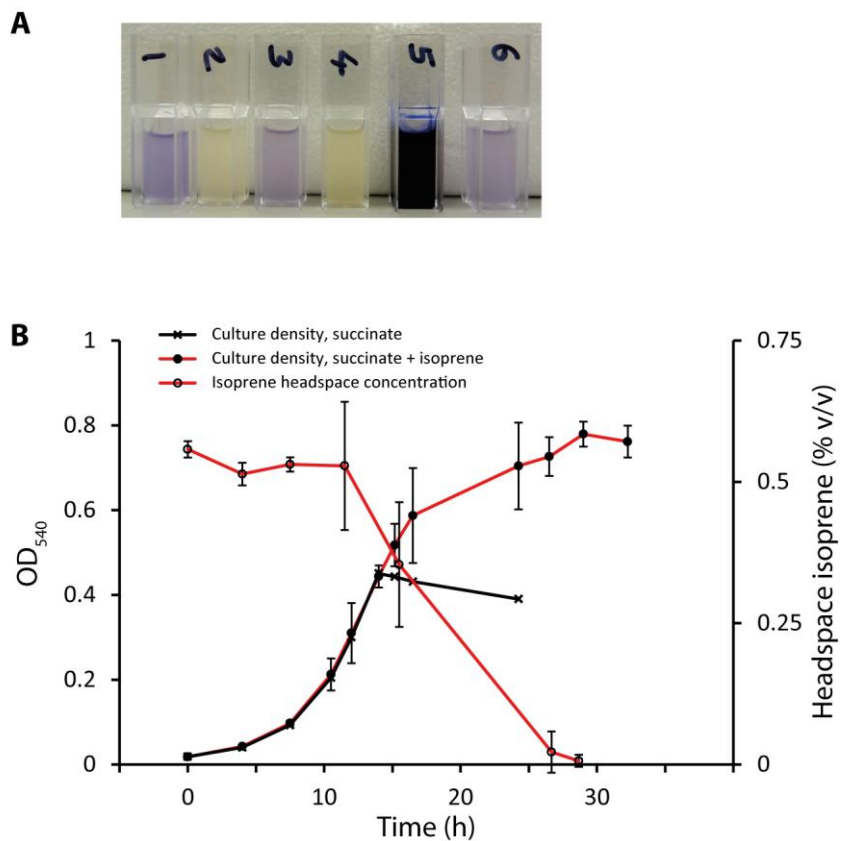

**Fig. S2.** (A) Epoxide forming ability of cells grown on isoprene (cuvettes 1, 3, 6) or succinate (cuvettes 2, 4) when incubated with hexene. The positive control, containing cells incubated with epoxyhexane, is shown in cuvette 5. Blue colouration indicates the presence of epoxide. (B) Growth of *Rhodococcus* sp. AD45 on succinate or succinate plus isoprene. Isoprene headspace concentration (when grown on succinate plus isoprene) is shown on the secondary (right) axis. Data show the mean  $\pm$  SD of three replicates.

**A** DnaA box sequences  
 Consensus from Moriya et al., (1985): TTAT (C/A) CACA  
*Rhodococcus* sp. AD45 sequences: TTATCCACA CAG TTATCCCA  
 GTTCCACA CAA TTATCCACA

*parS* sequences  
 Consensus from Livny et al., (2007): TGTTTCACGTGAAACA  
*Rhodococcus* sp. AD45 sequences: GGTTCACGTGAAACG  
 GGTTCACGTGAAACG  
 TGTTTCACGTGAAACC  
 TGTTTCACGTGGAACA  
 TGTTTCACGTGAAACA

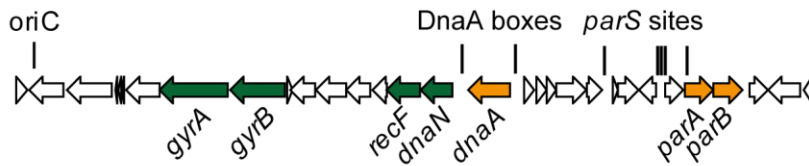

**B**

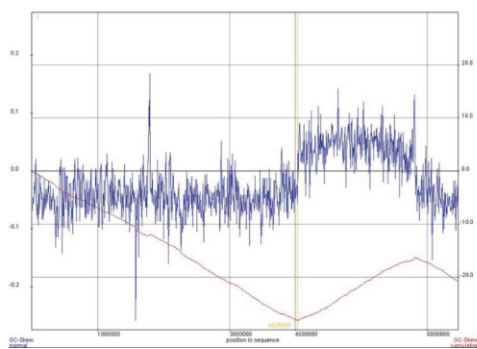

**Fig. S3.** Replication region of *Rhodococcus* sp. AD45. (A) The genome in the region of the putative replication origin, showing DnaA box and *parS* sequences. The consensus sequences from *Bacillus subtilis* (Moriya et al., 1985) and Gram-positive bacteria (Livny et al., 2007) are shown. (B) Guanine-cytosine (GC) asymmetry calculated using the web-based server GENSKREW (<http://genskew.csb.univie.ac.at/>).

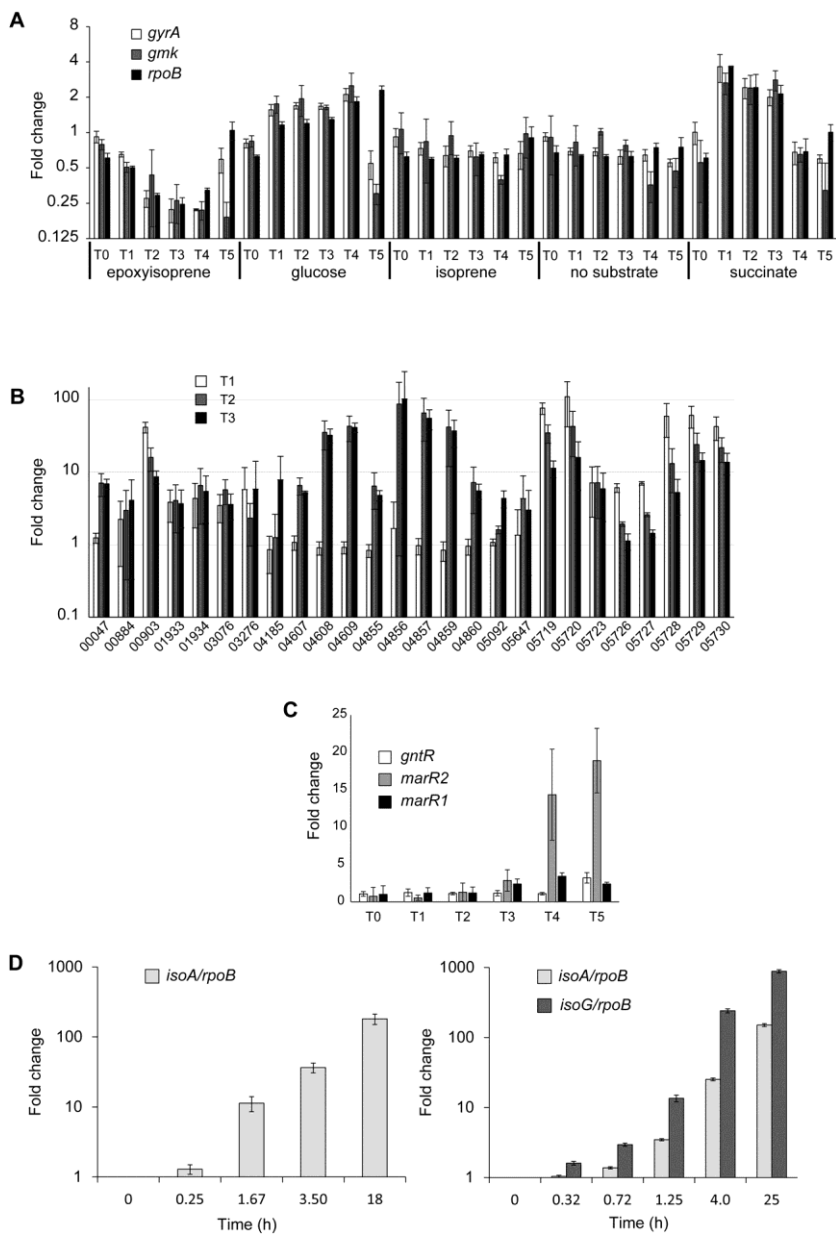

**Fig. S4.** (A) Transcripts of *rpoB*, *gyrA* and *gmk*, encoding the  $\beta$ -subunit of RNA polymerase, the  $\alpha$ -subunit of DNA gyrase and guanylate kinase, respectively, compared over five treatments and six time-points. The bar chart shows expression level (transcript abundance, RPKM), normalised to the mean level across all conditions for each gene. Data show the mean of three replicates  $\pm$  SD except for six samples that were excluded as described in *Experimental procedures*. T0 – T5 refer to the sampling time-points (time zero to 25 h) as described in the text. (B) Upregulation of genes, additional to the isoprene cluster SZ00\_06080 – SZ00\_06106, in epoxyisoprene-induced cells at time-points T1, T2, T3, compared with T0. All genes upregulated by at least fourfold in any of time-points T1 – T3, compared with T0, are shown. Data show the mean fold-change of three replicates  $\pm$  SD. SZ00\_05719 - SZ00\_05730 show homology to sequences possibly involved in amino alcohol metabolism (Nagy et al., 1995). SZ00\_04855 - SZ00\_04859 comprise a putative enterobactin exporter, peroxidase, multidrug resistance protein and hypothetical proteins and SZ00\_04607 - SZ00\_04609 are annotated as copper transport proteins. None of these genes, however, was also upregulated (>fourfold) in comparison with non-induced (no-substrate) and succinate-induced samples at the same time-points. (C) Upregulation of three regulatory genes from the isoprene cluster showing the change in abundance (fold-change) from T0 to T5 in isoprene-induced samples in comparison with no-substrate controls at the same time-points. Data show the mean of three replicates  $\pm$  SD, except T0, 15 replicates. (D) Upregulation of *isoA* (left) and *isoA* and *isoG* (right), in succinate-grown cells, induced by isoprene, quantified by RT-qPCR. The data are normalised to *rpoB* as reference gene, expressed relative to time-point zero, prior to induction, and show the mean  $\pm$  SD of three technical replicates from the two independent experiments, quantifying *isoA* (left) or both *isoA* and *isoG* (right).

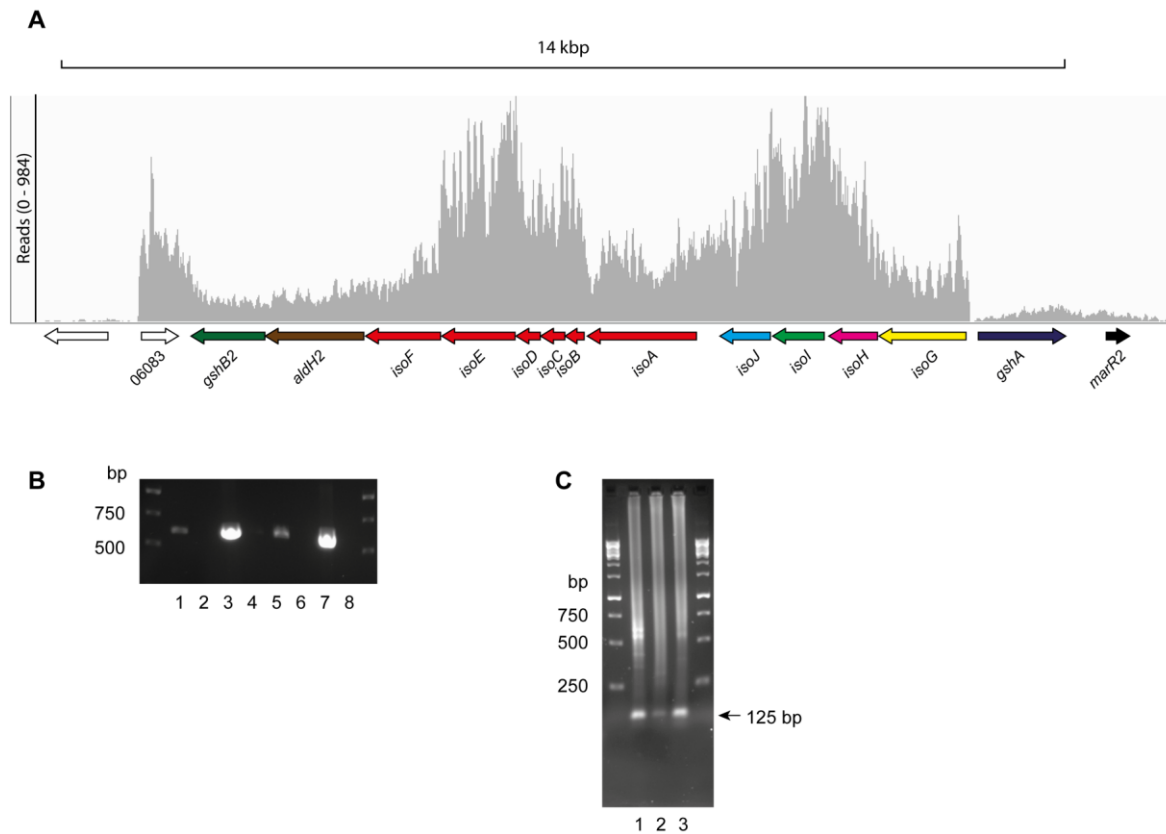

**Fig. S5.** (A) Transcript reads mapped to the isoprene cluster region of the *Rhodococcus* sp. AD45 genome, displayed in IGV (Thorvaldsdóttir et al., 2013). The trace, indicating read abundance, shows replicate 2 induced with isoprene at T5, and is representative of three replicates. The y-axis shows read coverage at each nucleotide position. The ORFs are shown below. The trace indicates that transcription start sites are located upstream of *isoG*, *gshA* and SZ00\_06083. Additionally, no termination of transcription is apparent in the *isoJ* – *isoA* intergene space. (B) PCR using primers spanning the *isoJ*–*isoA* intergene region using a cDNA template. Complementary DNA was synthesised from RNA extracted from cells grown on succinate (lane 1), isoprene (3) or epoxyisoprene (5). Lane 7 used a DNA template. Lanes 2, 4, 6 omitted reverse transcriptase from the cDNA synthesis reactions. Lane 8, no template control. Expected product size, 617 bp. The amplification of cDNA from all three growth conditions demonstrates the continuity of transcription across this region. (C) 5' RACE was used with RNA extracted from cells grown on epoxyisoprene (lane 1), isoprene (2) or succinate (3). The 125 bp band was cloned and sequenced, indicating a transcriptional start site approximately 75 bp 5' of the *isoG* start codon.

## References

- Eikmanns, B., Follettie, M., Griot, M., and Sinskey, A. (1989) The phosphoenolpyruvate carboxylase gene of *Corynebacterium glutamicum*: molecular cloning, nucleotide sequence, and expression. *Mol Gen Genet* **218**: 330-339.
- Entsch, B., Nan, Y., Weaich, K., and Scott, K.F. (1988) Sequence and organization of *pobA*, the gene coding for p-hydroxybenzoate hydroxylase, an inducible enzyme from *Pseudomonas aeruginosa*. *Gene* **71**: 279-291.
- Feng, J., Che, Y., Milse, J., Yin, Y.J., Liu, L., Ruckert, C. et al. (2006) The gene *ncgl2918* encodes a novel maleylpyruvate isomerase that needs mycothiol as cofactor and links mycothiol biosynthesis and gentisate assimilation in *Corynebacterium glutamicum*. *J Biol Chem* **281**: 10778-10785.
- Kitagawa, W., Miyauchi, K., Masai, E., and Fukuda, M. (2001) Cloning and characterization of benzoate catabolic genes in the Gram-positive polychlorinated biphenyl degrader *Rhodococcus* sp. strain RHA1. *J Bacteriol* **183**: 6598-6606.
- Knopková, M., Phensajjai, M., Veselý, M., Zemanová, M., Nešvera, J., and Pátek, M. (2007) Plasmid vectors for testing in vivo promoter activities in *Corynebacterium glutamicum* and *Rhodococcus erythropolis*. *Curr Microbiol* **55**: 234-239.
- Koffas, M.A.G., Ramamoorthi, R., Pine, W.A., Sinskey, A.J., and Stephanopoulos, G. (1998) Sequence of the *Corynebacterium glutamicum* pyruvate carboxylase gene. *Appl Microbiol Biotechnol* **50**: 346-352.
- Kok, M., Oldenhuis, R., van der Linden, M.P., Raatjes, P., Kingma, J., van Lelyveld, P.H., and Witholt, B. (1989) The *Pseudomonas oleovorans* alkane hydroxylase gene. Sequence and expression. *J Biol Chem* **264**: 5435-5441.
- Liu, T.-T., Xu, Y., Liu, H., Luo, S., Yin, Y.-J., Liu, S.-J., and Zhou, N.-Y. (2011) Functional characterization of a gene cluster involved in gentisate catabolism in *Rhodococcus* sp. strain NCIMB 12038. *Appl Microbiol Biotechnol* **90**: 671-678.
- Livny, J., Yamaichi, Y., and Waldor, M.K. (2007) Distribution of centromere-like *parS* sites in bacteria: insights from comparative genomics. *J Bacteriol* **189**: 8693-8703.

- Moriya, S., Ogasawara, N., and Yoshikawa, H. (1985) Structure and function of the region of the replication origin of the *Bacillus subtilis* chromosome. III. Nucleotide sequence of some 10,000 base pairs in the origin region. *Nucleic Acids Res* **13**: 2251-2265.
- Nagy, I., Schoofs, G., Compennolle, F., Proost, P., Vanderleyden, J., and de Mot, R. (1995) Degradation of the thiocarbamate herbicide EPTC (S-ethyl dipropylcarbamothioate) and biosafening by *Rhodococcus* sp. strain NI86/21 involve an inducible cytochrome P-450 system and aldehyde dehydrogenase. *J Bacteriol* **177**: 676-687.
- Patrauchan, M.A., Florizone, C., Dosanjh, M., Mohn, W.W., Davies, J., and Eltis, L.D. (2005) Catabolism of benzoate and phthalate in *Rhodococcus* sp. strain RHA1: redundancies and convergence. *J Bacteriol* **187**: 4050-4063.
- Saa, L., Jaureguibeitia, A., Largo, E., Llama, M., and Serra, J. (2010) Cloning, purification and characterization of two components of phenol hydroxylase from *Rhodococcus erythropolis* UPV-1. *Appl Microbiol Biotechnol* **86**: 201-211.
- Smits, T.H.M., Balada, S.B., Witholt, B., and van Beilen, J.B. (2002) Functional analysis of alkane hydroxylases from Gram-negative and Gram-positive bacteria. *J Bacteriol* **184**: 1733-1742.
- Tamura, K., Stecher, G., Peterson, D., Filipski, A., and Kumar, S. (2013) MEGA6: Molecular Evolutionary Genetics Analysis version 6.0. *Mol Biol Evol*.
- Thorvaldsdóttir, H., Robinson, J.T., and Mesirov, J.P. (2013) Integrative Genomics Viewer (IGV): high-performance genomics data visualization and exploration. *Brief Bioinform* **14**: 178-192.
- Vesely, M., Knoppova, M., Nesvera, J., and Patek, M. (2007) Analysis of *catRABC* operon for catechol degradation from phenol-degrading *Rhodococcus erythropolis*. *Appl Microbiol Biotechnol* **76**: 159-168.
